# Supplementary material for: Excess of blood eosinophils prior to therapy correlates with worse prognosis in mesothelioma
Source: PubMed Central journal article supplement (PMC10070849; doi:10.3389/fimmu.2023.1148798), 2023-03-21
Supplement: Table_1.pdf [file Table_1.pdf]

**Supplementary Table 1:** Comparison of patients' characteristics in the three cohorts (CHU Lille, CHU Liege, UZ Antwerp) included in the study

|                                   | <b>CHU Lille</b><br>(101 patients) |                         | <b>CHU Liege</b><br>(68 patients) |                         | <b>UZ Antwerp</b><br>(61 patients) |                         |
|-----------------------------------|------------------------------------|-------------------------|-----------------------------------|-------------------------|------------------------------------|-------------------------|
|                                   | AEC < 220/ $\mu$ L                 | AEC $\geq$ 220/ $\mu$ L | AEC < 220/ $\mu$ L                | AEC $\geq$ 220/ $\mu$ L | AEC < 220/ $\mu$ L                 | AEC $\geq$ 220/ $\mu$ L |
|                                   | <b>83</b><br>(82.2%)               | <b>18</b><br>(17.8%)    | <b>46</b><br>(67.65%)             | <b>22</b><br>(32.35%)   | <b>40</b><br>(65.6%)               | <b>21</b><br>(34.4%)    |
| <b>Sex, n</b>                     |                                    |                         |                                   |                         |                                    |                         |
| Male                              | 56                                 | 16                      | 41                                | 18                      | 28                                 | 20                      |
| Female                            | 27                                 | 2                       | 5                                 | 4                       | 12                                 | 2                       |
| <b>Histological subtype, n</b>    |                                    |                         |                                   |                         |                                    |                         |
| Epithelioid                       | 71                                 | 14                      | 34                                | 18                      | 39                                 | 16                      |
| Non-epithelioid                   | 10                                 | 4                       | 8                                 | 4                       | 1                                  | 5                       |
| Sarcomatoid                       | 5                                  | 2                       | 1                                 | 0                       | 0                                  | 3                       |
| Biphasic                          | 4                                  | 2                       | 5                                 | 3                       | 1                                  | 2                       |
| Desmoplastic                      | 1                                  | 0                       | 2                                 | 1                       | 0                                  | 0                       |
| Unknown                           | 2                                  | 0                       | 4                                 | 0                       | 0                                  | 0                       |
| <b>ECOG performance status, n</b> |                                    |                         |                                   |                         |                                    |                         |
| 0                                 | 23                                 | 6                       | 5                                 | 2                       | N/A                                | N/A                     |
| 1                                 | 47                                 | 10                      | 37                                | 16                      | N/A                                | N/A                     |
| 2                                 | 5                                  | 2                       | 2                                 | 0                       | N/A                                | N/A                     |
| Unknown                           | 0                                  | 0                       | 1                                 | 4                       | 41                                 | 20                      |

n = number of patients
